# Supplementary material for: Aluminium glycinate functionalized silica nanoparticles for highly specific separation of phosphoproteins
Source: Royal Society of Chemistry journal article supplement (doi:10.1039/c5tb01055a), 2015-01-01
Supplement: c5tb01055a1.pdf [file c5tb01055a1.pdf]

## Supporting Information for

### Aluminium glycinate functionalized silica nanoparticles for highly specific separation of phosphoproteins†

Wei Liu, Jiangnan Zheng, Shihua Li, Ruirui Wang, Zian Lin\* and Huanghao Yang\*

*Ministry of Education Key Laboratory of Analysis and Detection for Food Safety,  
Fujian Provincial Key Laboratory of Analysis and Detection Technology for Food  
Safety, Department of Chemistry, Fuzhou University, Fuzhou, Fujian, 350108, China*

- **First corresponding author:** Zian Lin;
- **Second corresponding author:** Huanghao Yang
- **Postal address:** College of Chemistry, Fuzhou University,  
Fuzhou, Fujian, 350116, China
- **Fax:** 86-591-22866135

\* To whom correspondence should be addressed. **E-mail:**

[zianlin@fzu.edu.cn](mailto:zianlin@fzu.edu.cn) (Z.A. Lin); [hhyang@fzu.edu.cn](mailto:hhyang@fzu.edu.cn) (H.H. Yang);

Table Q1 EDAX of SiO<sub>2</sub> and AGNP

| SiO <sub>2</sub> | Element | Wt%   | At%   | AGNP | Element | Wt%   | At%   |
|------------------|---------|-------|-------|------|---------|-------|-------|
|                  | C       | 48.82 | 58.97 |      | C       | 53.62 | 61.54 |
|                  | O       | 37.38 | 33.90 |      | O       | 42.27 | 36.43 |
|                  | Si      | 13.80 | 7.13  |      | Si      | 3.51  | 1.72  |
|                  | Al      | 0     | 0     |      | Al      | 0.6   | 0.31  |

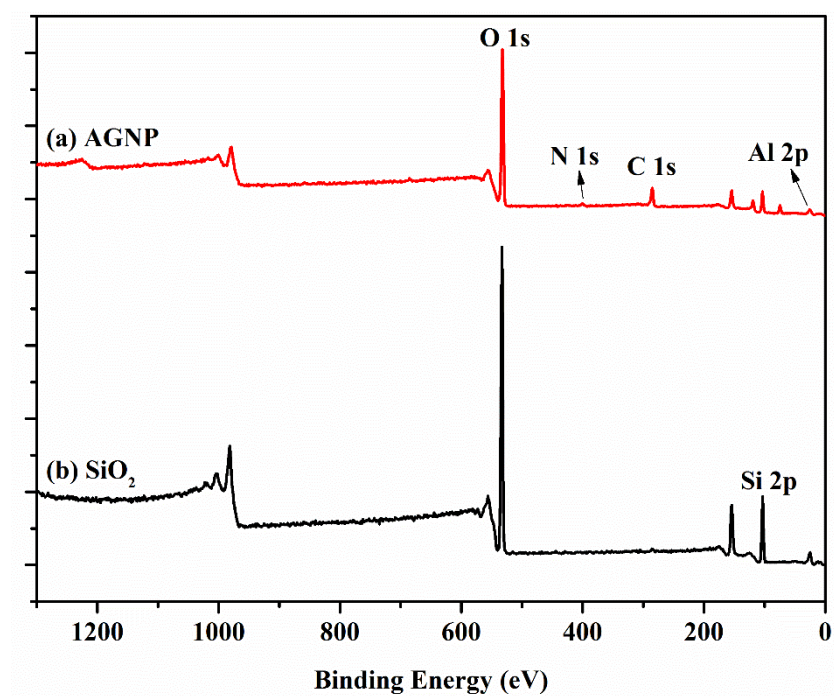

Fig. S1. XPS of SiO<sub>2</sub> and AGNP.

**Table S2** Textural characteristics of SiO<sub>2</sub> and AGNP.

|                  | Specific surface area (m <sup>2</sup> /g) | Pore volume (cm <sup>3</sup> /g) | Average pore size (nm) |
|------------------|-------------------------------------------|----------------------------------|------------------------|
| SiO <sub>2</sub> | 64.21                                     | 0.274                            | 17.07                  |
| AGNP             | 137.80                                    | 0.478                            | 13.88                  |

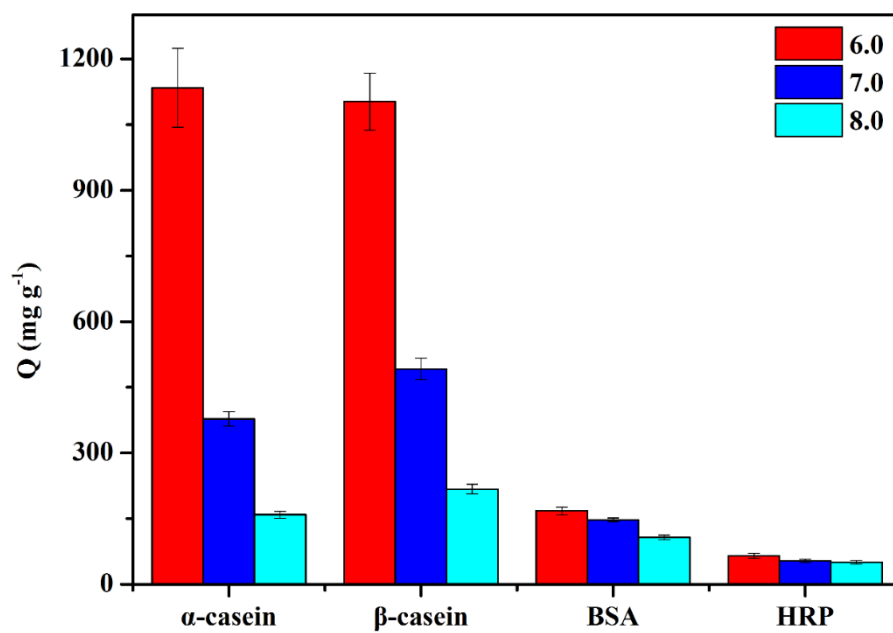

**Fig. S2** Effect of pH on proteins adsorption.

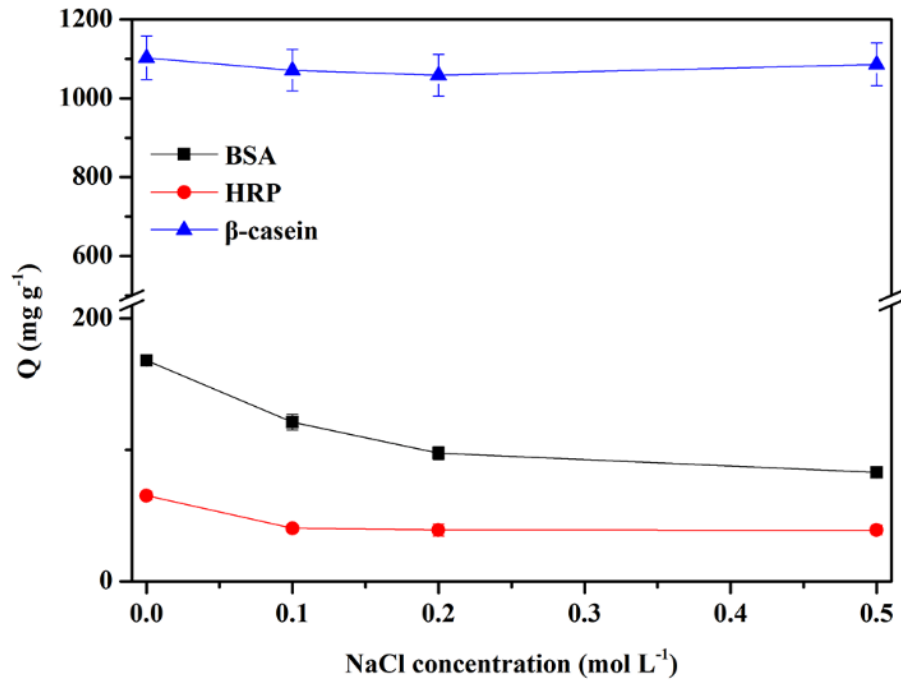

**Fig. S3** Effect of ionic strength on proteins adsorption.

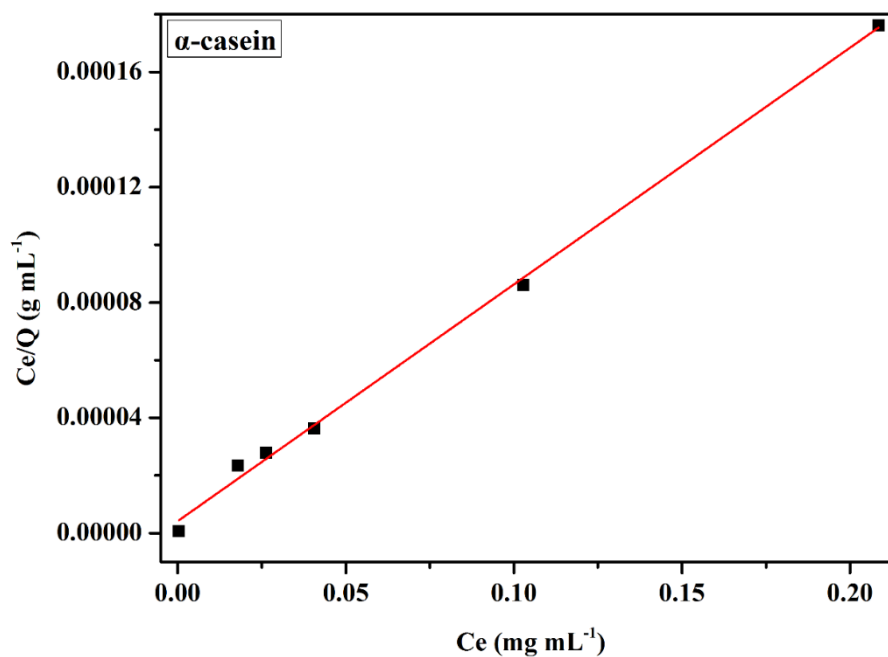

**Fig. S4-1** Fitting of the adsorption isotherm of  $\alpha$ -casein on AGNP by using the Langmuir model. The fitted parameters are summarized in Table 1.

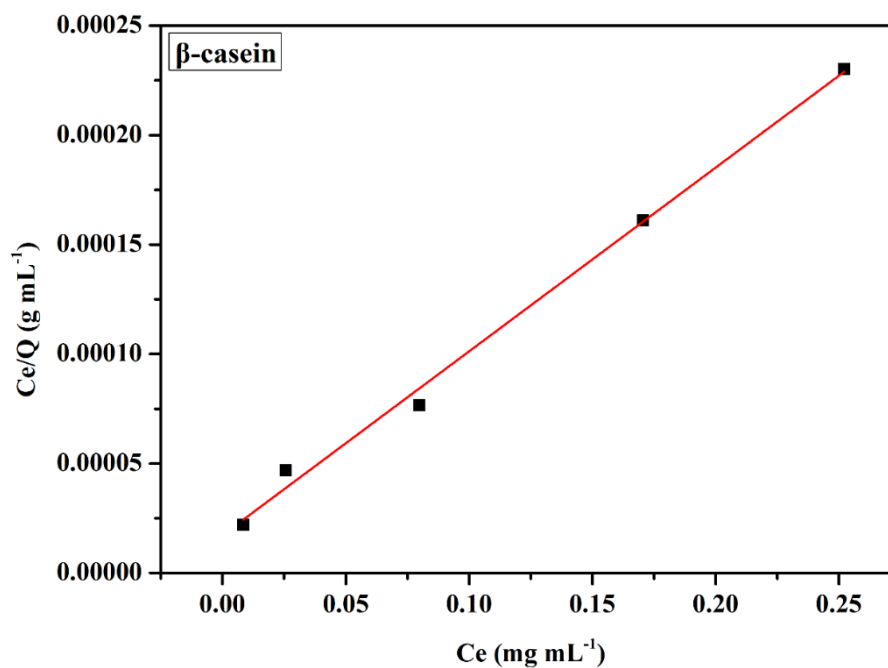

**Fig. S4-2** Fitting of the adsorption isotherm of  $\beta$ -casein on AGNP by using the Langmuir model. The fitted parameters are summarized in Table 1.

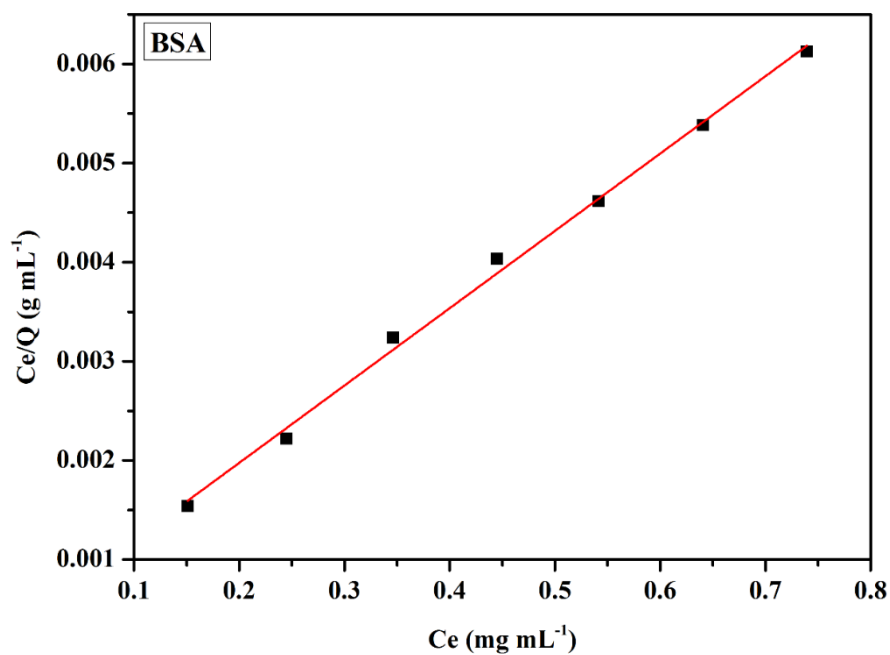

**Fig. S4-3** Fitting of the adsorption isotherm of BSA on AGNP by using the Langmuir model. The fitted parameters are summarized in Table 1.

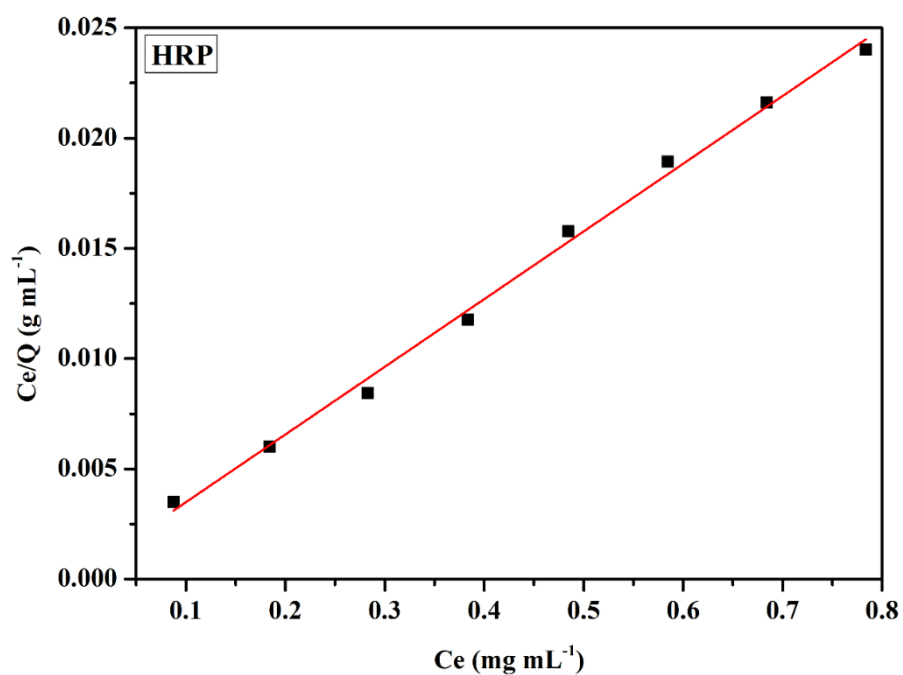

**Fig. S4-4** Fitting of the adsorption isotherm of HRP on AGNP by using the Langmuir model. The fitted parameters are summarized in Table 1.
